# 1 **Reproducible, high-dimensional imaging in archival human tissue by** 2 **Multiplexed Ion Beam Imaging by Time-of-Flight (MIBI-TOF)**

3  
4 Candace C. Liu<sup>1†</sup>, Marc Bosse<sup>1†</sup>, Alex Kong<sup>1</sup>, Adam Kagel<sup>1</sup>, Robert Kinders<sup>2</sup>, Stephen M.  
5 Hewitt<sup>3</sup>, Sean C. Bendall<sup>1\*</sup>, Michael Angelo<sup>1\*</sup>

6  
7 <sup>1</sup>Department of Pathology, Stanford University, Stanford, California 94304

8 <sup>2</sup>Office of the Director, Division of Cancer Treatment and Diagnosis, National Cancer  
9 Institute, Bethesda, MD 20892

10 <sup>3</sup>Experimental Pathology Laboratory, Laboratory of Pathology, Center for Cancer  
11 Research, National Cancer Institute, National Institutes of Health, Bethesda, MD 20892

12  
13 †Authors contributed equally to this work

14 \*Corresponding Author

## 15 16 17 **Abstract**

18  
19 Multiplexed ion beam imaging by time-of-flight (MIBI-TOF) is a form of mass spectrometry  
20 imaging that uses metal labeled antibodies and secondary ion mass spectrometry to image  
21 dozens of proteins simultaneously in the same tissue section. Working with the National Cancer  
22 Institute's (NCI) Cancer Immune Monitoring and Analysis Centers (CIMAC), we undertook a  
23 validation study, assessing concordance across a dozen serial sections of a tissue microarray of  
24 21 samples that were independently processed and imaged by MIBI-TOF or single-plex  
25 immunohistochemistry (IHC) over 12 days. Pixel-level features were highly concordant across all  
26 16 targets assessed in both staining intensity ( $R^2 = 0.94 \pm 0.04$ ) and frequency ( $R^2 = 0.95 \pm 0.04$ ).  
27 Comparison to digitized, single-plex IHC on adjacent serial sections revealed similar concordance  
28 ( $R^2 = 0.85 \pm 0.08$ ) as well. Lastly, automated segmentation and clustering of eight cell populations  
29 found that cell frequencies between replicates yielded an average correlation of  $R^2 = 0.92 \pm 0.06$ .  
30 Taken together, we demonstrate that MIBI-TOF, with well-vetted reagents and automated  
31 analysis, can generate consistent and quantitative annotations of clinically relevant cell states in  
32 archival human tissue, and more broadly, present a scalable framework for benchmarking  
33 multiplexed IHC approaches.

## 34 **Introduction**

35 Immunohistochemistry (IHC) is commonly used in clinical diagnostics and basic research  
36 to visualize proteins in intact tissue using chromogenic or fluorescent reporters.<sup>1-3</sup> IHC staining is  
37 used routinely to guide diagnoses and therapeutic selection in the vast majority of solid tissue  
38 malignancies.<sup>4-6</sup> Although it remains an indispensable tool in anatomic pathology, chromogenic  
39 IHC has inherent limitations that hinder quantitative interpretation and prevent routine multiplexed  
40 staining.<sup>1,7 8-10</sup> These drawbacks are particularly limiting in the field of cancer immunotherapy,  
41 where accurate evaluation of the tumor immune microenvironment requires the simultaneous  
42 mapping of dozens of proteins.<sup>11,12</sup> The emerging field of spatial-omics with a multitude of  
43 analytical solutions is working towards replacement of conventional IHC-driven decision  
44 making.<sup>11,13</sup> While it is clear that new technologies and assays have the potential to generate new  
45 types of data, it is unclear whether they can reliably replicate the decision-making information in  
46 current 'gold standard' assays.

47 Our lab has developed multiplexed ion beam imaging by time-of-flight (MIBI-TOF), which  
48 avoids the limitations of optical imaging by using secondary mass spectrometry to image dozens  
49 of proteins on the same tissue section.<sup>14,15</sup> In the place of chromogenic or fluorescent reporters,  
50 MIBI-TOF uses primary antibodies that are labeled with isotopically enriched metal reporters that  
51 can be cleanly delineated and quantified using time-of-flight (TOF) mass spectrometry. Tissue  
52 sections are treated with all metal labeled primary antibodies simultaneously using a simple  
53 protocol that does not include secondary antibodies, enzymatic amplification, or cyclical staining.  
54 During MIBI-TOF analysis, the tissue is sputtered by a primary ion beam in a pixel-by-pixel fashion  
55 that liberates the metal tags as secondary ions that are subsequently quantified by TOF. Our lab  
56 routinely quantifies 40 targets simultaneously and are currently working towards increasing this  
57 capability to 60 or more.<sup>16-18</sup> Notably, MIBI-TOF is compatible with formalin-fixed, paraffin-  
58 embedded (FFPE) samples and can detect both low and high abundant targets with a dynamic  
59 range that spans six orders of magnitude.<sup>15 19-21</sup>

60 For technologies like MIBI-TOF to be used in large translational studies and ultimately for  
61 routine clinical diagnostics, robustness and reproducibility studies are needed, as are  
62 standardized workflows for interpreting these complex data. Furthermore, it is important to show  
63 that new technologies are concordant with existing, established clinical assays. In collaboration  
64 with the National Cancer Institute (NCI) as part of the Cancer Immune Monitoring and Analysis  
65 Centers-Cancer Immunologic Data Commons (CIMAC-CIDC) network<sup>22</sup>, we benchmarked the  
66 reproducibility of multiplexed antibody staining using MIBI-TOF. To achieve this, we compared  
67 MIBI-TOF imaging data across six independent replicates of adjacent tissue microarray (TMA)  
68 serial sections. Antibody staining and MIBI-TOF imaging of each serial section were carried out  
69 independently and randomized with respect to all experimental parameters. Additionally, we  
70 assessed MIBI-TOF concordance with single-plex IHC chromogenic staining. In keeping with the  
71 goal of CIMAC-CIDC to develop comprehensive, standardized immune monitoring analysis for  
72 biomarker discovery, we show that MIBI-TOF is a highly reproducible assay and concordant with  
73 single-plex IHC.

74

## 75 **Materials and Methods**

### 76 **Tissue microarray construction and sectioning**

77 A tissue microarray (TMA) was constructed using human FFPE blocks from Stanford  
78 Pathology. The TMA consisted of disease-free controls as well as multiple types of carcinomas,  
79 sarcomas, and central nervous system lesions. A table of the cores included in this study can be  
80 found in Table 1 (1 mm cores). For each TMA tissue block, 13 consecutive serial sections (4  $\mu$ m  
81 section thickness) were acquired. The IHC and MIBI-TOF recuts were alternated so that for the  
82 IHC concordance analysis, MIBI-TOF and IHC could be compared in adjacent sections. The  
83 assays performed on each section were as follows:

84 Section 1: H&E

85 Sections 2,4,6,8,10: Chromogenic IHC

86 Sections 3,5,7,9,11,13: MIBI-TOF full panel staining

87 Section 12: MIBI-TOF unstained control

| Slide Number    | Replicate 1 | Replicate 2 | Replicate 3 | Replicate 4 | Replicate 5 | Replicate 6 |
|-----------------|-------------|-------------|-------------|-------------|-------------|-------------|
| Stain Order     | 1           | 2           | 6           | 5           | 3           | 4           |
| Day of Analysis | 5           | 2           | 6           | 3           | 4           | 1           |

| FOV                                     | Order of Acquisition |    |    |    |    |    |
|-----------------------------------------|----------------------|----|----|----|----|----|
| CONTROL TONSIL                          | 14                   | 4  | 17 | 1  | 19 | 1  |
| CONTROL TONSIL                          | 18                   | 20 | 21 | 7  | 20 | 2  |
| CONTROL TONSIL                          | 19                   | 10 | 6  | 5  | 13 | 3  |
| CONTROL TONSIL                          | 11                   | 1  | 2  | 18 | 5  | 4  |
| CONTROL LYMPH NODE                      | 9                    | 3  | 18 | 2  | 11 | 5  |
| CONTROL LYMPH NODE                      | 15                   | 6  | 11 | 12 | 10 | 6  |
| CONTROL LYMPH NODE                      | 3                    | 7  | 15 | 9  | 4  | 7  |
| CONTROL THYMUS                          | 7                    | 11 | 14 | 20 | 3  | 8  |
| CONTROL THYMUS                          | 5                    | 12 | 5  | 13 | 8  | 9  |
| CONTROL SPLEEN                          | 17                   | 19 | 16 | 16 | 21 | 10 |
| SALIVARY WARTHIN SALIVARY               | 2                    | 17 | 4  | 4  | 9  | 11 |
| HIGH GRADE, CARCINOMA BLADDER           | 16                   | 15 | 12 | 19 | 18 | 12 |
| CONTROL PLACENTA                        | 8                    | 9  | 20 | 14 | 7  | 13 |
| DUCTAL CARCINOMA BREAST                 | 20                   | 18 | 3  | 21 | 1  | 14 |
| DUCTAL CARCINOMA BREAST                 | 1                    | 2  | 13 | 15 | 12 | 15 |
| LEIOMYOSARCOMA, MET SOFT TISSUE         | 12                   | 13 | 7  | 8  | 6  | 16 |
| HIGH-GRADE MYXOFIBROSARCOMA SOFT TISSUE | 6                    | 16 | 19 | 10 | 15 | 17 |
| FOREIGN BODY GIANT CELLS SOFT TISSUE    | 21                   | 21 | 9  | 6  | 14 | 18 |
| ADENOCARCINOMA COLON                    | 10                   | 8  | 1  | 3  | 2  | 19 |
| PLEOMORPHIC DERMAL SARCOMA SKIN         | 13                   | 14 | 10 | 11 | 16 | 20 |
| SQUAMOUS CELL CARCINOMA SKIN            | 4                    | 5  | 8  | 17 | 17 | 21 |

**Table 1: Description of tissue cores and parameter randomization**

88

## 89 Antibody preparation

90 The full MIBI-TOF panel containing 16 antibodies can be found in Table 2. The lyophilized  
 91 antibody panel was obtained from Ionpath (“Cell Classification” human panel). Individual metal  
 92 labeled antibodies for IHC were also obtained from Ionpath: CD3 (D7A6E), CD8 (C8/144B), CD68  
 93 (D4B9C), Pax5 (D7H5X), PanCK (AE1/AE3). Prior to staining, the lyophilized antibody panel was  
 94 suspended in antibody diluent buffer (TBS-IHC tween, Donkey serum 3%) and filtered with a 0.1  
 95  $\mu\text{m}$  filter (Millipore).

| Target              | Clone         |
|---------------------|---------------|
| dsDNA               | 35I9 DNA      |
| beta-tubulin        | D3U1W         |
| CD4                 | EPR6855       |
| CD11c               | EP1347Y       |
| CD56                | MRQ-42        |
| CD31                | EP3095        |
| CD68                | D4B9C         |
| CD8                 | C8/144B       |
| CD3                 | D7A6E         |
| Vimentin            | D21H3         |
| CD20                | L26           |
| HLA DR              | EPR3692       |
| CD45                | 2B11 & PD7/26 |
| Na-K-ATPase alpha 1 | D4Y7E         |
| Pax5                | D7H5X         |
| PanCK               | AE1/AE3       |

**Table 2: MIBI-TOF staining panel.** Targets used for IHC concordance analysis are highlighted in green.

## 96 Tissue staining

97 Tissue staining for the six MIBI-TOF recuts was carried out over six separate days,  
98 randomized with respect to serial section number (Table 1). Detailed protocols can be found here:  
99 [dx.doi.org/10.17504/protocols.io.byzrpx56](https://doi.org/10.17504/protocols.io.byzrpx56), [dx.doi.org/10.17504/protocols.io.bf6ajrae](https://doi.org/10.17504/protocols.io.bf6ajrae),  
100 [dx.doi.org/10.17504/protocols.io.bhmej43e](https://doi.org/10.17504/protocols.io.bhmej43e). We used the Sequenza manual staining system for  
101 both MIBI-TOF and IHC staining ([dx.doi.org/10.17504/protocols.io.bmc6k2ze](https://doi.org/10.17504/protocols.io.bmc6k2ze)).

102 Briefly, slides were baked at 70°C overnight followed by deparaffinization and rehydration  
103 with successive washes of 30 seconds and 3 dips each in xylene (3 washes), 100% ethanol (2  
104 washes), 95% ethanol (2 washes), 80% ethanol (1 wash), 70% ethanol (1 wash), and ddH<sub>2</sub>O (2  
105 washes) with a Leica ST4020 Linear Stainer (Leica Biosystems). Tissues next underwent antigen  
106 retrieval by submerging slides in 3-in-1 Target Retrieval Solution (pH 9, DAKO Agilent) and  
107 incubating at 97°C for 40 minutes in a Lab Vision PT Module (Thermo Fisher Scientific). After  
108 cooling to room temperature, slides were assembled with a cover plate on a Sequenza rack and  
109 washed with PBS wash buffer. The tissue was blocked for 1 hour at room temperature with 1x  
110 TBS IHC Wash Buffer with Tween 20 with 3% (v/v) normal donkey serum (Sigma-Aldrich), 0.1%

111 (v/v) cold fish skin gelatin (Sigma Aldrich), 0.1% (v/v) Triton X-100, and 0.05% (v/v) sodium azide.  
112 The blocking buffer was washed by adding 200  $\mu$ L of antibody diluent buffer in the Sequenza  
113 upper chamber. After the diluent buffer flow through, 120  $\mu$ L of the suspended panel of antibodies  
114 was added to the slides. The Sequenza rack was then placed at 4°C overnight (16 hr).

115 Following the overnight incubation, slides were washed twice with 1 mL of PBS wash  
116 buffer and fixed in a solution of 2% glutaraldehyde (Electron Microscopy Sciences) solution in  
117 low-barium PBS for 5 minutes. Slides were successively washed with 30 seconds and 3 dips per  
118 wash in PBS (1 wash), 0.1 M Tris at pH 8.5 (3 washes), ddH<sub>2</sub>O (2 washes), and then dehydrated  
119 by washing in 70% ethanol (1 wash), 80% ethanol (1 wash), 95% ethanol (2 washes), and 100%  
120 ethanol (2 washes). Slides were dried under vacuum prior to imaging.

121 Single-plex chromogenic IHC was performed for five targets using the same antibody  
122 clone as used in the MIBI-TOF staining panel (Table 2). Dewaxing, epitope retrieval, blocking,  
123 hybridization, and washing for IHC tissue sections were identical to that of MIBI, with the addition  
124 of blocking endogenous peroxidase activity with 3% H<sub>2</sub>O<sub>2</sub> (Sigma Aldrich) in ddH<sub>2</sub>O after epitope  
125 retrieval. After overnight primary antibody staining, tissues were washed twice with 1 mL wash  
126 buffer and the antigen:antibody complex detected with the ImmPRESS universal (Anti-  
127 Mouse/Anti-Rabbit) kit (Vector labs). Chromogenic solution (DAB) was incubated for 40 s and the  
128 reaction was stopped with PBS. The slides were counterstained with hematoxylin.

129 H&E tissue sections were reviewed to identify missing tissue cores, cores with large areas  
130 of necrosis, tissue folding, and any other macroscopic defect. All IHC and MIBI-TOF data were  
131 manually reviewed for excessive background staining.

### 132 **MIBI-TOF imaging**

133 The order of image acquisition for each recut was randomized with respect to section  
134 number and carried out on six separate days (Table 1). Within each run for each recut, the order  
135 of acquisition for the TMA cores was randomized as well (Table 1). Area normalized Xe<sup>+</sup> primary  
136 ion dose of 9nA\*hr\*mm<sup>-2</sup> was used for all MIBI-TOF image acquisitions. At the end of each

137 imaging run, sensitivity and mass resolution were quantified using a molybdenum foil standard  
138 (Supplementary Figure 1).

### 139 **Image processing**

140 MIBI-TOF data processing was performed using a standardized pipeline from Ionpath.  
141 During data extraction, to only capture the monoatomic peaks that correspond to the monoatomic  
142 isotopic labels and avoid the polyatomic ions containing hydrogen, we integrated all peaks using  
143 a mass window of  $(X-0.3, X)$  where  $X$  is the nominal mass-to-charge ( $m/z$ ) for each metal reporter  
144 tag.

145 Background signal arising from bare slide was removed as described previously using  
146 predefined thresholds for Ba, Ta, and Au.<sup>16,23</sup> Isobaric interferences arising from diatomic reporter  
147 adducts and polyatomic hydrocarbons were removed iteratively using empirically defined  
148 compensation coefficients (Supplementary Table 1). Lastly, we used a combination of several  
149 density metrics, including reachability density, connectivity, and Voronoi tessellation to estimate  
150 and remove noise from each channel (Supplementary Table 2). These density metrics leverage  
151 both spatial and intensity information.

152 Hematoxylin counterstained IHC slides were digitized with the NanoZoomer slide scanner  
153 at 40x magnification (Hamamatsu). The threshold for hematoxylin and each DAB channel was  
154 set collectively for all images in the staining batch using a DAB channel extracted from the original  
155 counterstained image via spectral unmixing. An initial threshold approximation was set with  
156 automatic image histogram thresholding. The thresholds were then confirmed by three trained  
157 users on controls and additional images for validation and adjusted until consensus was reached  
158 (Supplementary Table 3).

### 159 **Marker quantitation**

160 In all MIBI-TOF images, for each marker, the frequency and mean intensity of positive  
161 pixels in each tissue core was quantified. The resultant value for percent positive pixels (PPP)  
162 and mean pixel intensity (MPI) for these images was then normalized with respect to the signal

163 intensity of endogenous carbon-containing mass peaks originating from the tissue itself. Peaks at  
164 36, 37 and 38 m/z corresponding to 3C, 3C1H, and 3C2H were integrated for each image (referred  
165 to here as  $C_i$ ) and the average of these values across all images in all six TMAs was calculated  
166 (referred here to  $C_{avg}$ ). To calculate the normalization coefficient ( $C_N$ ) for a given tissue core,  $C_i$   
167 for that tissue core was divided by  $C_{avg}$  ( $C_N = C_i / C_{avg}$ ). Median and standard deviation for  $C_N$   
168 across all tissue cores was  $1.03 \pm 0.3$ . For IHC images, the frequency of positive pixels was  
169 quantified using deconvolved and thresholded DAB images (PPP).

### 170 **Reproducibility and concordance**

171 To assess replicate reproducibility, least squares linear regression was used to compare  
172 PPP for tissue cores in each TMA to the average PPP across all six TMAs. Similarly, least squares  
173 linear regression was used to compare MPI for tissue cores in each TMA to the average MPI  
174 across all six TMAs. For each comparison, we calculated the slope ( $m$ ) and coefficient of  
175 determination ( $R^2$ ). To assess concordance of MIBI-TOF with single-plex IHC, we used least  
176 squares linear regression to compare values for PPP attained by MIBI-TOF and IHC in adjacent  
177 serial tissue sections.

### 178 **Cell segmentation and phenotyping**

179 To delineate the location of single cells in MIBI-TOF images, we performed cell  
180 segmentation using the pre-trained Mesmer convolutional neural network architecture.<sup>24</sup> We used  
181 dsDNA as the nuclear marker and HLA class I and Na-K-ATPase as the membrane markers as  
182 input to the network. The output of Mesmer is the location of each cell in the image.

183 After cell segmentation, the next step of the analysis pipeline was to determine the  
184 phenotype of each individual cell. Pre-processed MIBI-TOF images were first Gaussian blurred  
185 using a standard deviation of 2 for the Gaussian kernel. Pixels were normalized by their total  
186 expression, such that the total expression of each pixel was equal to 1. A 99.9% normalization  
187 was applied for each marker. Pixels were clustered into 100 clusters using FlowSOM<sup>25</sup> based on  
188 the expression of 12 phenotypic markers: CD3, CD4, CD8, CD11c, CD20, CD31, CD45, CD56,



189 CD68, PanCK, Pax5, and Vimentin. The average expression of each of the 100 pixel clusters was  
190 found and the z-score for each marker across the 100 pixel clusters was computed. All z-scores  
191 were capped at 3, such that the maximum z-score was 3. Using these z-scored expression values,  
192 the 100 pixel clusters were meta-clustered using consensus hierarchical clustering into 12 meta-  
193 clusters. Next, by applying the segmentation masks that delineate the boundaries of all cells in  
194 the images, we counted the number of each of the 12 pixel clusters in each cell. This resulted in  
195 a pixel cluster by cell count table. These counts were then normalized by cell size. Using these  
196 frequency measurements as the feature vector, the cells were clustered using FlowSOM into 100  
197 cell clusters. Similarly to the pixel clusters, the average expression of each of the 100 cell clusters  
198 was found and the z-score was computed. All z-scores were capped at 3, such that the maximum  
199 z-score was 3. Using these z-scored values, the 100 cell clusters were meta-clustered using  
200 consensus hierarchical clustering into 10 cell meta-clusters. Each of the cell meta-clusters was  
201 then manually annotated with its cell phenotype by assessing marker expression, resulting in a  
202 total of eight cell types: B cells, T cells, dendritic cells, macrophages, NK cells, fibroblasts,  
203 endothelial cells, and epithelial cells. To assess the concordance of cell phenotyping between  
204 serial sections of the same tissue core, we quantified the number of each cell type in each image,  
205 then calculated the average Spearman correlation of these frequencies between replicate images  
206 of each core.

207

## 208 **Results**

### 209 **Experimental design for MIBI-TOF replicate and IHC concordance**

210 To assess the reproducibility of MIBI as well as benchmark against single-plex  
211 chromogenic IHC, we took 13 serial sections from a TMA constructed for this study (see Methods)  
212 that included disease-free controls and multiple types of carcinomas, sarcomas, and central  
213 nervous system lesions (Figure 1). Here, every other slide was stained and processed for either  
214 MIBI-TOF analysis or single-plex chromogenic IHC for the indicated target, in addition to slides

215 for H&E and unstained tissue control. To control for confounding factors due to batch effects  
216 resulting from day of tissue staining and imaging, the order that each TMA was stained and  
217 imaged were randomized with respect to serial sectioning order. Additionally, the order that each  
218 tissue core was acquired for each TMA was randomized as well (Table 1).

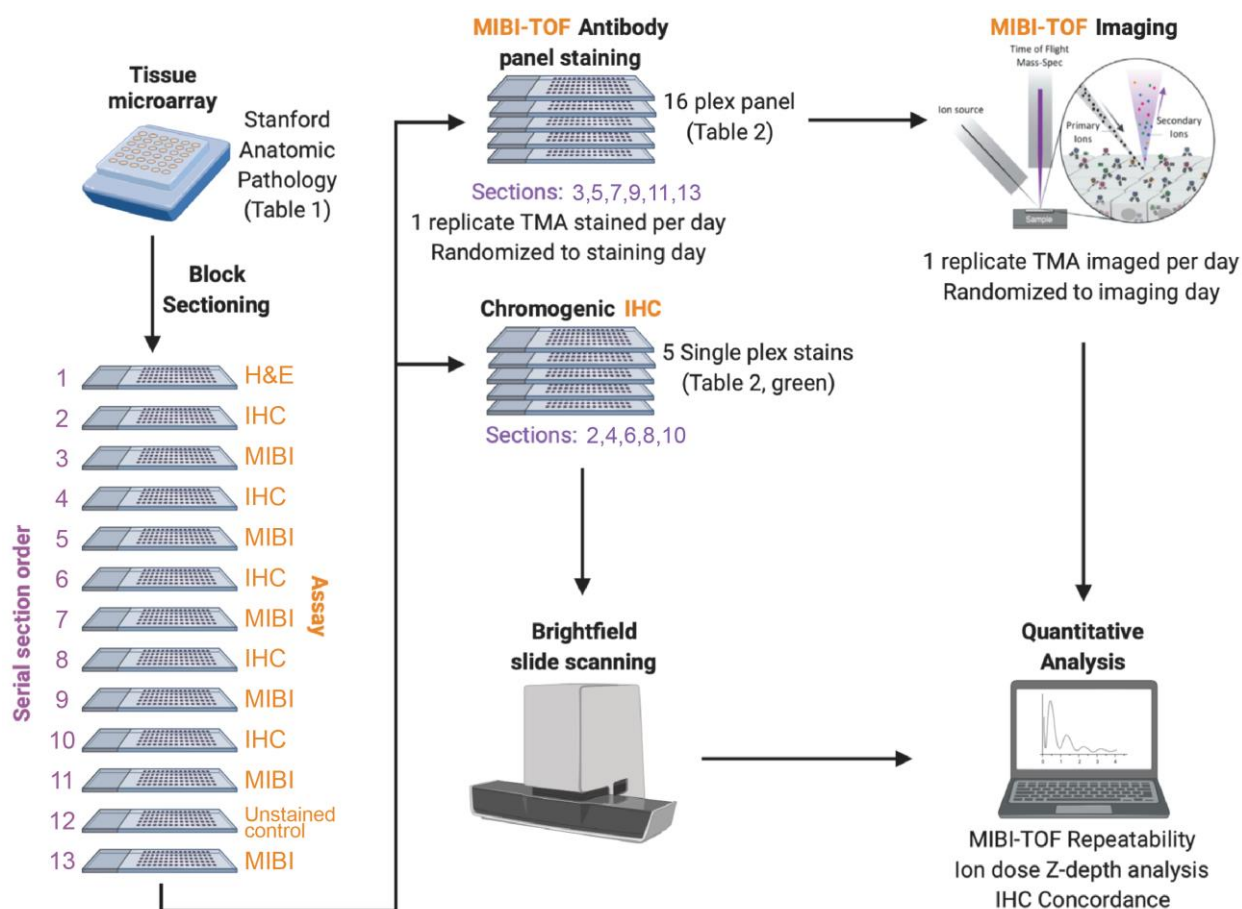

**Figure 1: MIBI-TOF validation overview.** A tissue microarray (TMA) was constructed using human FFPE tissue blocks, and the TMA was serially sectioned for analysis by single-plex chromogenic IHC and MIBI-TOF. The order that each serial section was stained and imaged was randomized. We then analyzed the concordance between IHC and MIBI-TOF, as well as assessed reproducibility of MIBI-TOF between serial sections.

219

## 220 MIBI-TOF replicate concordance

221 For MIBI-TOF, 21 tissue cores in six replicate TMAs were stained with a 16-plex antibody  
222 panel and analyzed for a total of 126 MIBI-TOF images (Table 2). Instrument stability was  
223 assessed prior to data acquisition using a molybdenum foil standard, for which we know the

224 expected range of ion counts. Primary ion current and mass resolution varied insignificantly over  
225 the course of the study (SD = 7% and 1.8%, respectively, Supplementary Figure 1A,B). Minor  
226 variations in ion detector sensitivity (SD = 22%) were within historical norms and were not found  
227 to impact subsequent quantitative comparisons (Supplementary Figure 1C). Fields in each tissue  
228 core were manually co-registered with respect to a slide scan of a reference H&E serial section,  
229 which showed high concordance of histological features (Supplementary Figure 2). High quality  
230 MIBI-TOF imaging data was obtained for all targets in the antibody staining panel in all six TMA  
231 slides. Manual evaluation of each marker demonstrated robust and specific staining to the target  
232 cells of interest in both normal and disease tissue cores (Figure 2).

233 Assay reproducibility was assessed by comparing marker intensity and abundance in each  
234 TMA replicate. An example of co-registered fields-of-view (FOVs) from 6 serial sections of a  
235 representative tissue core is shown in Figure 3A, illustrating the high degree of reproducibility  
236 between the replicate sections. PPP values for CD3, a marker for T cells, and CD20, a marker for  
237 B cells, in the fields for this tissue core were  $22.6\% \pm 2.5$  and  $20.6\% \pm 8.1$  (mean  $\pm$  SD),  
238 respectively. The significantly higher standard deviation observed with CD20 is attributable to  
239 section-to-section changes in the area occupied by two germinal centers (marked by expression  
240 of the B cell marker CD20) as sections were taken from the tissue core.

241 Linear regression of normalized values for marker intensity (MPI) and marker frequency  
242 (PPP) for each tissue core in each TMA replicate (see Methods) were used to determine the  
243 degree of concordance with respect to the average across all six replicates. For MPI, which  
244 quantifies the average marker intensity in positive pixels, the resultant slope ( $m$ ) and coefficient  
245 of determination ( $R^2$ ) values for all markers in all six replicates were close to 1, with a  $m$  of  $0.96 \pm$   
246  $0.14$  and a  $R^2$  of  $0.94 \pm 0.04$  (mean  $\pm$  SD, Figure 3B-D). MPI captures marker intensity, thus  $m$   
247 and  $R^2$  values close to 1 indicate that when a marker is present, the brightness of the marker is  
248 highly concordant across replicates. Similarly, for PPP, which quantifies the total number of pixels  
249 that are positive for a given marker,  $m$  and  $R^2$  in all replicates and markers were also close to 1,

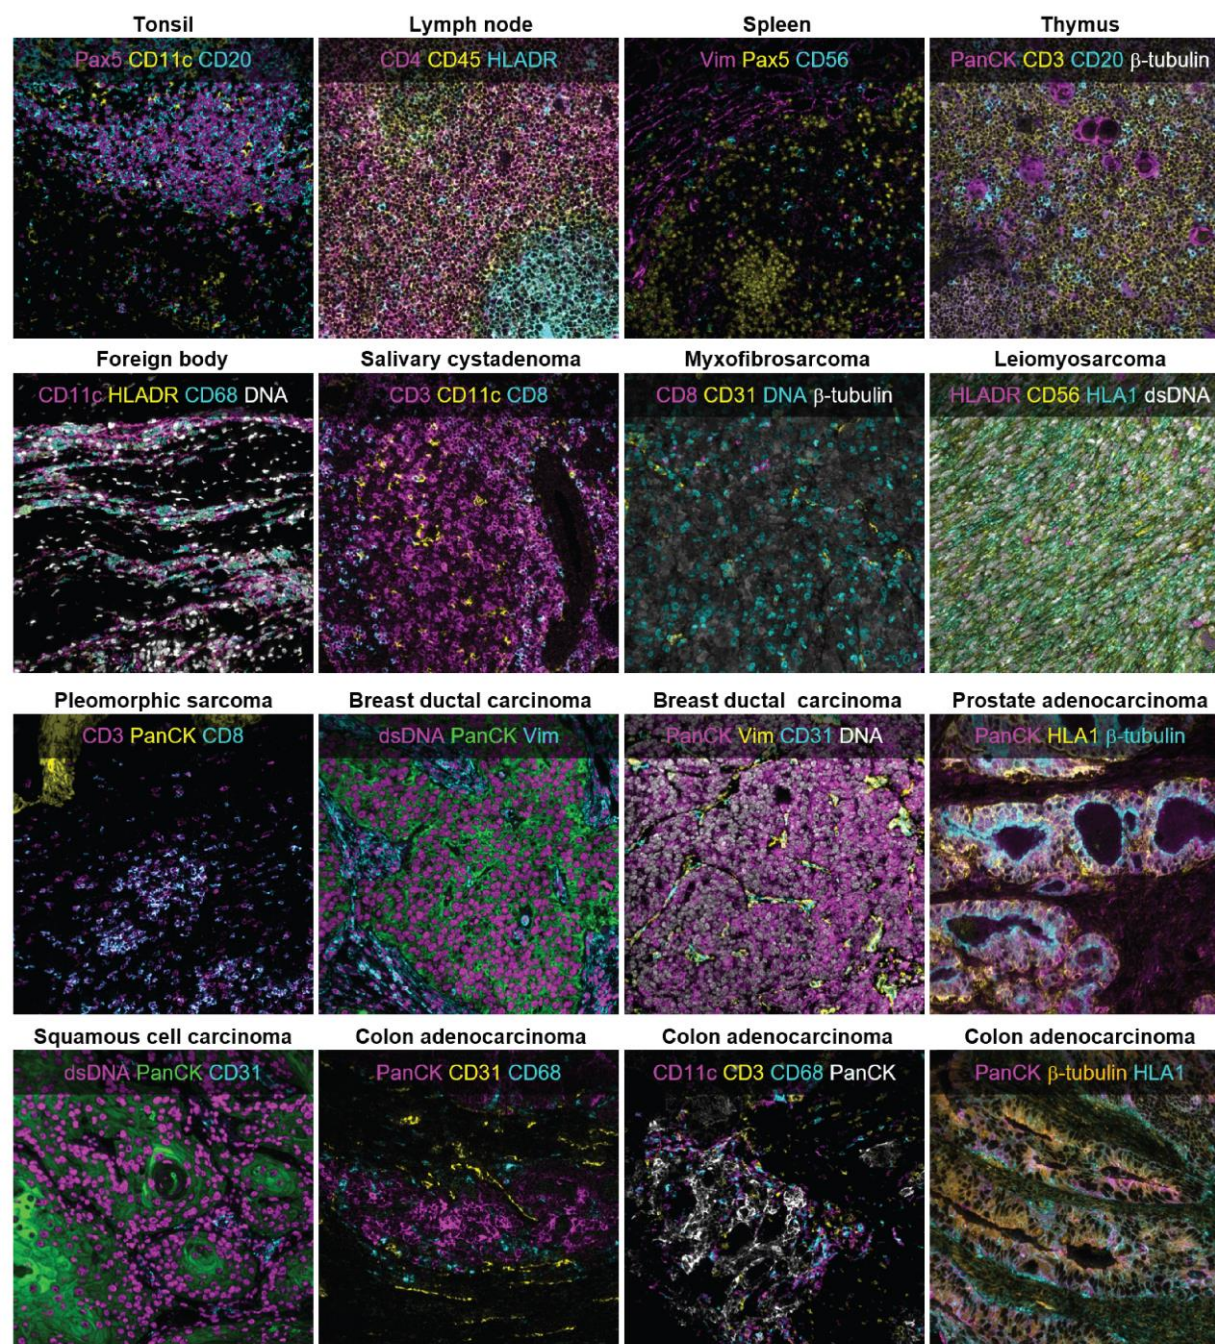

**Figure 2: Representative MIBI-TOF imaging data.** High-quality MIBI-TOF imaging data was attained for 16 markers for all replicate TMA slides. Representative images of the various tissue types in the TMA are shown here.

250 with a  $m$  of  $0.98 \pm 0.15$  and a  $R^2$  of  $0.95 \pm 0.04$  (mean  $\pm$  SD, Supplementary Figure 3). PPP  $m$   
 251 and  $R^2$  values close to 1 indicate that the number of positive pixels across replicates of the same  
 252 core is consistent. Taken together, these two metrics demonstrate that MIBI-TOF images of serial

253 sections of the same tissue core that were randomized for staining and imaging day were highly  
 254 concordant, lending evidence for the reproducible nature of MIBI-TOF.

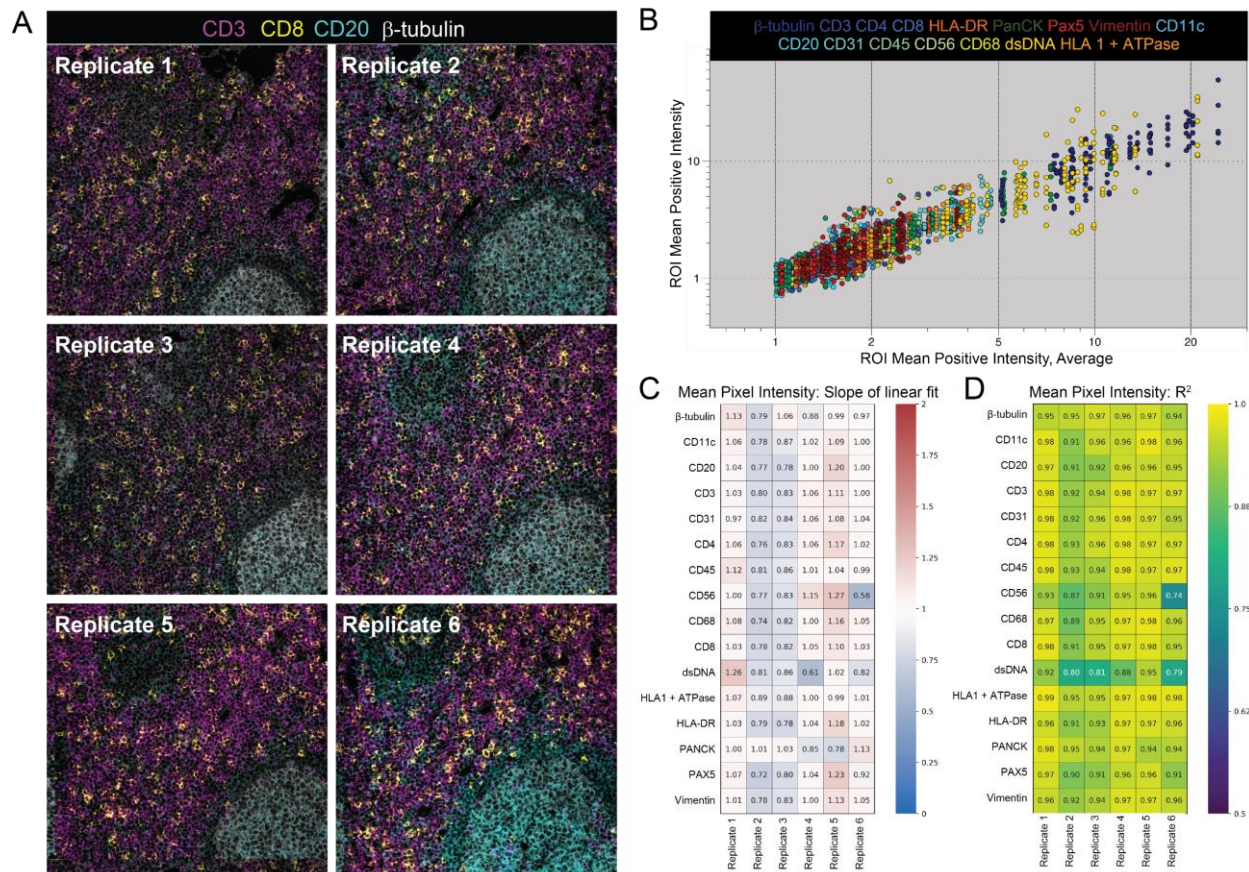

**Figure 3: Concordance of Mean Pixel Intensity by MIBI-TOF.** (A) Representative MIBI-TOF replicate images from serial sections of the same TMA core of lymph node tissue. (B) Plot of Mean Positive Intensity (MPI) of each FOV vs. the average MPI of all FOVs of the same TMA core. Each color represents a different marker. We performed least squares linear regression of the MPI of all six replicates of each TMA core vs the average MPI of the core and found the slope  $m$  (C) and coefficient of determination  $R^2$  (D) for all 16 markers.

### 255 Reproducibility of cell immunophenotypic assignments by MIBI-TOF

256 An important step in the analysis of high-dimensional imaging data is the identification of  
 257 single cell lineages by immunophenotype in the images. Thus, we next assessed the  
 258 reproducibility of single-cell annotations across the replicate images of each tissue core. Our lab  
 259 has recently developed a cell segmentation algorithm that can accurately identify the location of  
 260 cells in solid tissue without the need for manual fine-tuning or user adjustment.<sup>24</sup> We used this

261 method to delineate the location of single cells in the images, then used a pixel-clustering based  
262 approach to classify the single cells into eight cell lineages: B cells, T cells, dendritic cells,  
263 macrophages, NK cells, fibroblasts, endothelial cells, and epithelial cells (Figure 4A, see  
264 Methods).<sup>17</sup> After classifying the cells in each of the images, we quantified the number of each  
265 cell type in each image and assessed concordance between replicates by calculating the average

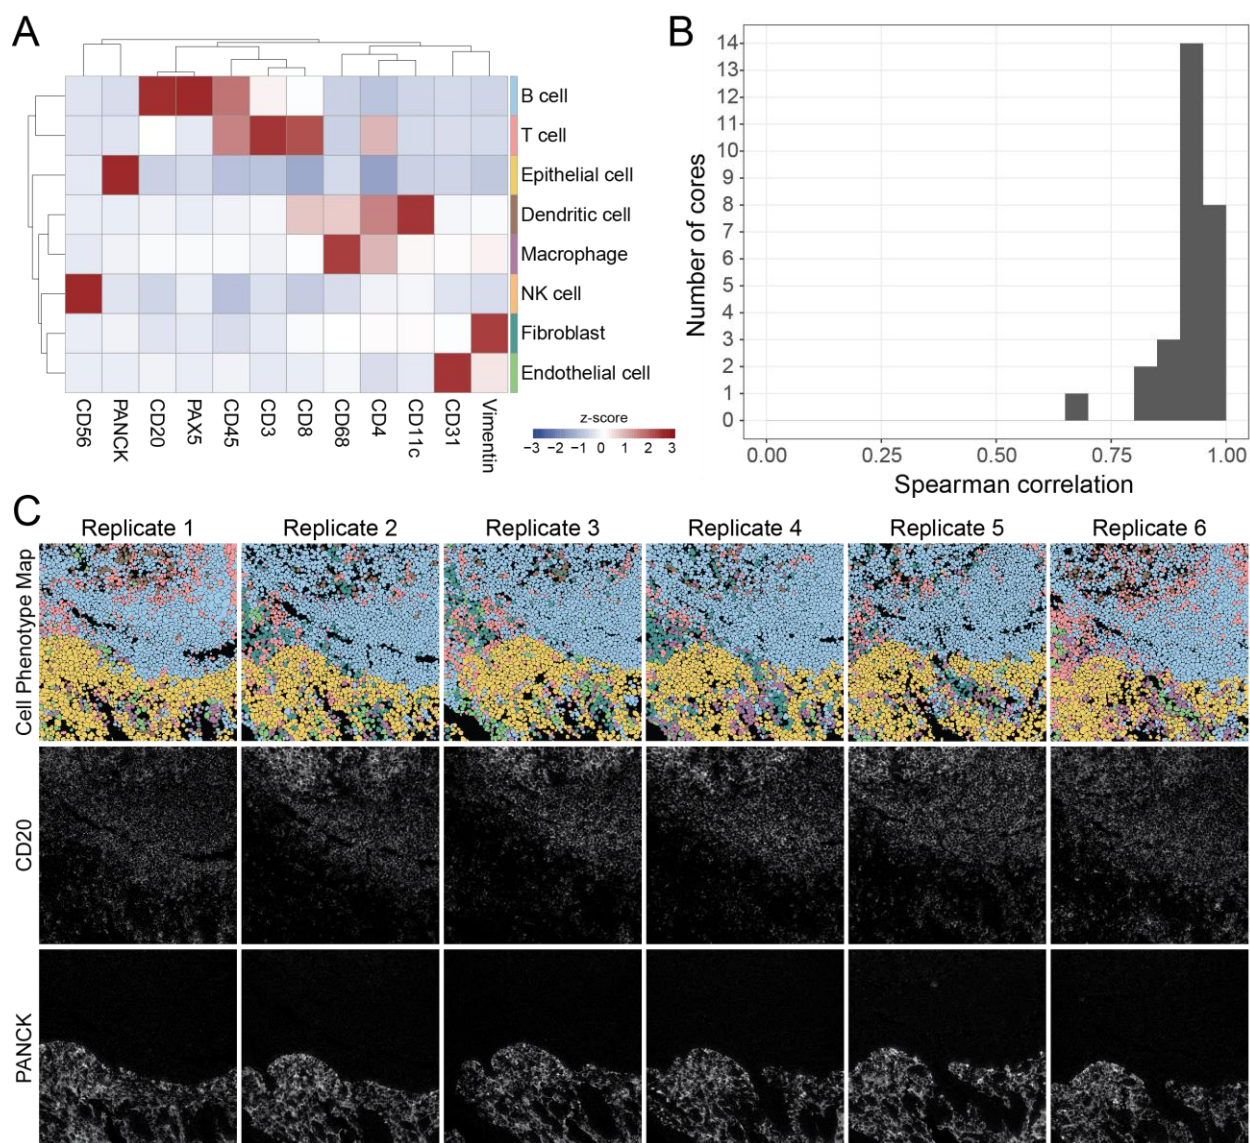

**Figure 4: Reproducibility of cell phenotyping by MIBI-TOF.** (A) Cells were assigned to a phenotype using an unsupervised clustering approach and manually annotated into eight major cell types. Expression values were z-scored for each marker. High z-scores are an indicator of high marker specificity. (B) The Spearman correlation between all serial sections of each TMA core using the frequency of cell types in each FOV. (C) Representative images of six serial sections of the same TMA core of tonsil tissue. Top row: Cell phenotype map colored according to the eight cell types shown in (A). Middle and bottom rows: MIBI-TOF images showing CD20 and PanCK expression.

266 Spearman correlation of these frequencies between the replicate images of each tissue core  
267 (Figure 4B). We expected variation in these Spearman correlation values, since the replicate  
268 sections of the same tissue core are serial sections of 4  $\mu\text{m}$  each (with additional serial sections  
269 taken for IHC concordance analysis). In total, 13 serial sections were obtained for each tissue for  
270 MIBI-TOF or IHC (see Methods). Therefore, we would expect true biological differences when  
271 comparing serial sections up to 48  $\mu\text{m}$  apart. When comparing these replicate MIBI-TOF images,  
272 we observed that broad histological features were conserved, such as germinal centers or vessels  
273 (Figure 3A, 4C, Supplementary Figure 4). The average Spearman correlation was high,  $0.92 \pm$   
274  $0.06$  (mean  $\pm$  SD), demonstrating that cell phenotyping, a necessary step in high-dimensional  
275 image analysis, was reproducible between MIBI-TOF images of the same tissue core.

276

#### 277 **Concordance of MIBI-TOF with single-plex chromogenic IHC**

278 Chromogenic IHC is the standard modality for disease prognosis and therapeutic selection  
279 in the vast majority of solid tumors. Therefore, we assessed concordance to determine if  
280 multiplexed imaging by MIBI-TOF can quantitatively recapitulate single-plex immunoassays.  
281 Similar to the analyses described above that were used to compare MIBI-TOF data across  
282 replicates, the frequency of marker positive pixels in MIBI-TOF images co-registered with single-  
283 plex chromogenic IHC stains were compared by linear regression across all 21 tissue cores.  
284 Because we alternated recuts for MIBI-TOF and IHC, we could compare MIBI-TOF and IHC on  
285 adjacent serial sections. Single-plex chromogenic IHC images were acquired for five targets:  
286 CD3, CD8, Pax5, PanCK, and CD68. Marker positivity by single-plex IHC for CD3, CD8, Pax5,  
287 PanCK, and CD68 in adjacent serial sections were compared with the respective values found by  
288 MIBI-TOF using linear regression (Figure 5, Supplementary Figure 5). For all five targets,  
289 concordance of MIBI-TOF and IHC was high, with an  $R^2$  of  $0.85 \pm 0.08$  (mean  $\pm$  SD, all  $R^2 > 0.7$ ),  
290 demonstrating that MIBI-TOF data is consistent with single-plex chromogenic IHC data.

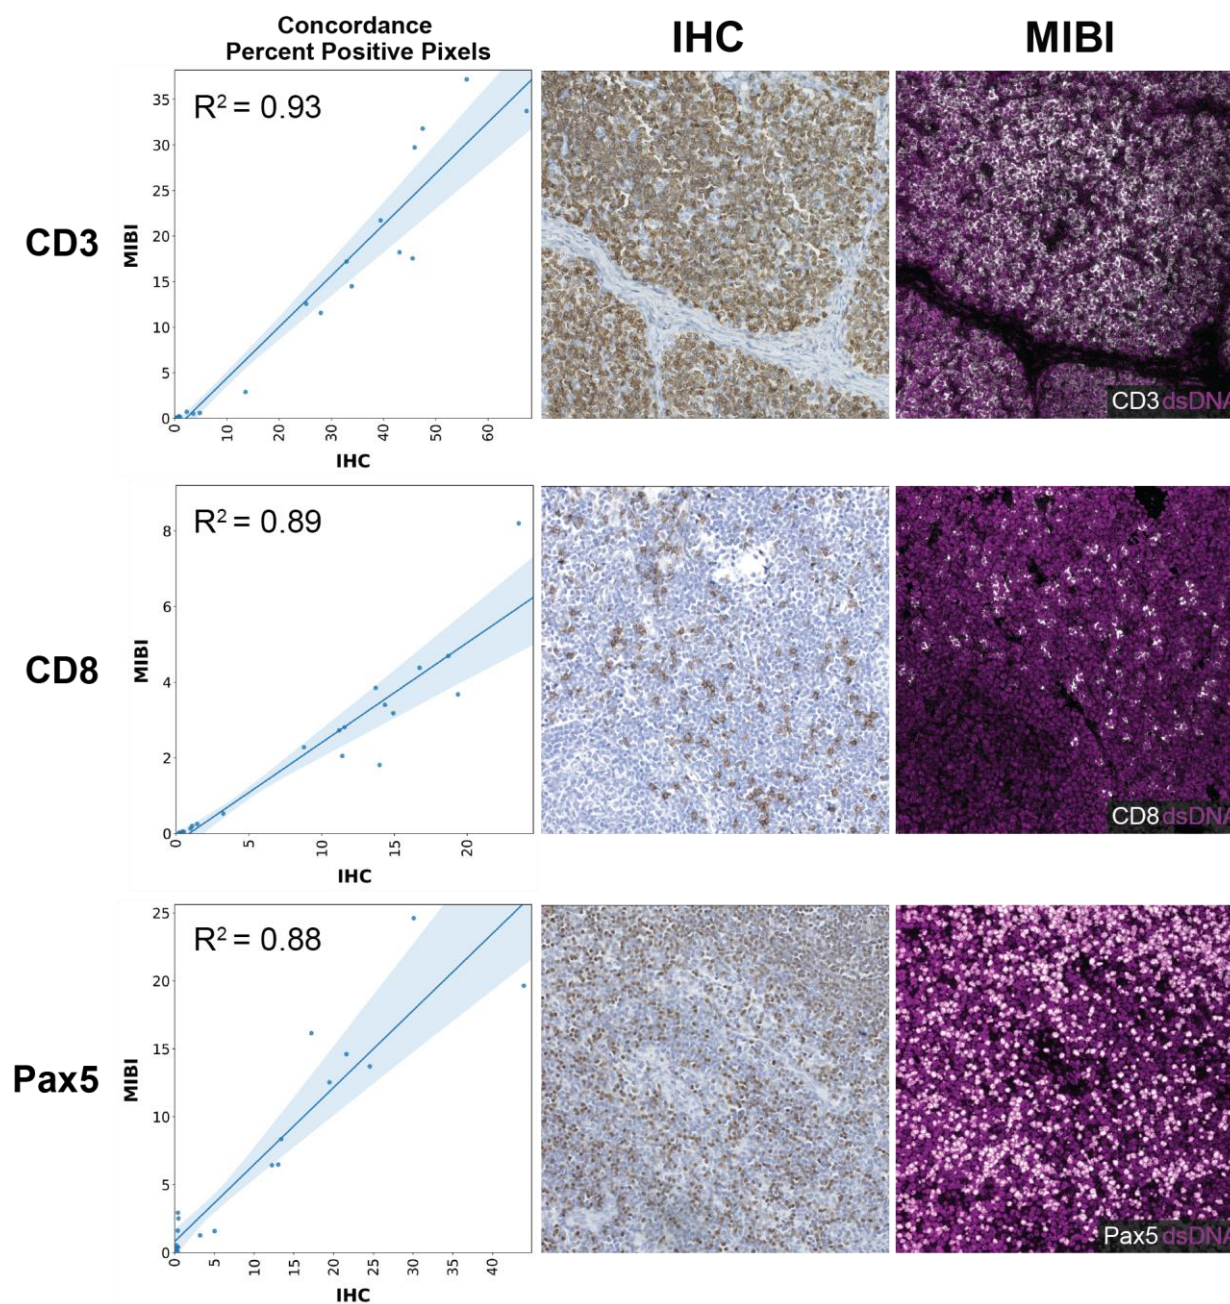

**Figure 5: Concordance of MIBI-TOF with single-plex chromogenic IHC.** Representative images of the comparison of MIBI-TOF images co-registered with single-plex chromogenic IHC stains. Each data point represents the PPP by MIBI-TOF and IHC for a single tissue core. Shaded area represents 95% confidence interval. Additional markers are shown in Supplementary Figure 5.

291

## 292 Discussion

293 In this study, we assessed the reproducibility of MIBI-TOF by evaluating assay  
294 concordance on six serial sections from a TMA, including disease-free tonsil, lymph node, thymus,



295 and spleen, in addition to multiple types of carcinomas, sarcomas, and central nervous system  
296 lesions. Importantly, each serial section was stained independently on six separate days with a  
297 16-marker staining panel and subsequently analyzed on six different days. 21 tissue cores were  
298 analyzed in each serial section for a total of 126 MIBI-TOF images. The staining intensity and  
299 frequency of positive pixels for each serial section (MPI and PPP, respectively) were compared  
300 against average values across all runs using least squares linear regression. In all comparisons,  
301 concordance between serial sections of the same tissue core was high, with  $m$  of  $0.96 \pm 0.14$  and  
302  $R^2$  of  $0.94 \pm 0.04$  when assessing MPI and  $m$  of  $0.98 \pm 0.15$  and  $R^2$  of  $0.95 \pm 0.04$  when assessing  
303 PPP (mean  $\pm$  SD). The staining pattern of each marker was manually inspected to confirm, where  
304 relevant, appropriate subcellular localization and histologic distribution. For example, CD20  
305 staining in positive regions of tonsil and lymph node in all replicates was verified to be membrane-  
306 localized and enriched in follicles. Furthermore, we assessed the reproducibility of cell  
307 phenotyping across replicates and found that across replicate sections, the location and lineage  
308 of cells identified using our data analysis pipeline were highly concordant, with an average  
309 Spearman correlation of cell type frequencies between replicates of  $0.92 \pm 0.06$  (mean  $\pm$  SD).  
310 Importantly, the data analysis pipeline used to go from MIBI-TOF images to cell phenotypes was  
311 nearly fully automated. Cell segmentation and clustering were fully automated with no user input  
312 and only minimal user intervention was needed when labelling cell clusters with cell annotations,  
313 demonstrating that the biological annotation of MIBI-TOF images is robust without the need for  
314 significant researcher intervention. In addition, we assessed concordance of PPP by MIBI-TOF  
315 for five markers with single-plex IHC and found that MIBI-TOF and single-plex IHC were highly  
316 concordant with an average  $R^2$  of 0.85. Taken together, the combination of consistent staining,  
317 imaging, and feature extraction illustrates the highly reproducible nature of MIBI-TOF.

318 One limitation of validation studies involving serial tissue sections is that exact biological  
319 replicates cannot be obtained since each tissue section is somewhat different and is not a  
320 homogenized bulk sample. In this study, since the tissue sections are  $4 \mu\text{m}$  each and a total of

321 13 serial sections were acquired, the first and last tissue section were separated axially by 48  $\mu\text{m}$ .  
322 Also, when balancing assay replication versus concordance with an orthogonal assay, like single-  
323 plex IHC here, one needs to prioritize what physically adjacent slides are used for. In this case,  
324 we selected physically adjacent slides for benchmarking single-plex IHC since any one marker's  
325 distribution would be heavily dependent on cell composition. Lymphocytes that are approximately  
326  $\sim 10 \mu\text{m}$  would be best preserved in adjacent sections. Although there will be true biological  
327 differences in this volume of tissue, this study represents the next best situation, in which we  
328 compared adjacent serial sections as a proxy for true replicates. Furthermore, this was a single-  
329 site study, in which all staining and imaging was performed in our laboratory. We are currently  
330 planning a multi-site study to assess inter-institutional differences in instrument performance and  
331 tissue staining. Still, we believe the overall metrics for benchmarking outlined here will be  
332 sufficient to assess these future efforts.

333 This study was performed as a part of the Cancer Immune Monitoring and Analysis  
334 Centers Cancer Immunology Data Commons (CIMAC-CIDC) network<sup>22</sup>, which is a NCI Cancer  
335 Moonshots initiative to provide the technology and expertise for immunotherapy clinical trials.  
336 Multiplexed tissue imaging is an integral assay for fully characterizing the tumor immune  
337 microenvironment, which requires the simultaneous profiling of multiple tumor and immune cell  
338 types. MIBI-TOF can routinely provide quantitative, multiplexed imaging data that is back  
339 compatible with archival FFPE tissue and conventional anatomic pathology workflows. Technical  
340 innovations in reagents and instrumentation will further increase the throughput and multiplexing  
341 ability of MIBI-TOF. In the future, we envision that MIBI-TOF will not only be used for reproducible  
342 basic science research, but also enable the adoption of quantitative spatial signatures in the clinic  
343 for more accurate diagnosis and therapeutic selection. At the same time, as efforts to develop  
344 other IHC-centric spatial imaging technologies evolve, the analytical framework and approach laid  
345 out in this study should serve as a guide for their assessment.

346

347 **Data Availability**

348 The datasets generated and/or analyzed during the current study are available in Zenodo:  
349 10.5281/zenodo.5542727.

350

351 **Acknowledgements**

352 The authors thank Sushama Varma and Matt van de Rijn for creating the tissue microarray for  
353 this study.

354

355 **Conflict of Interest**

356 M.A. and S.C.B. are inventors on patents related to MIBI technology. M.A. and S.C.B. are  
357 consultants, board members and shareholders in Ionpath Inc.

358

359 **Author Contributions**

360 M.B. performed experiments and imaging. A.K., A.K., and C.C.L. performed data analysis. C.C.L.  
361 and M.A. wrote the manuscript. S.C.B., R.K., and S.M.H. reviewed the manuscript. S.C.B. and  
362 M.A. supervised the work.

363

364 **Funding**

365 This work was supported by DOD EOH W81XWH2110143, 1-DP5-864 OD019822,  
366 1R01AG056287, 1R01AG057915, R01AG068279, 1UH3CA246633, 1U24CA224309, and the  
367 Bill and Melinda Gates Foundation.

368 **References**

- 369
- 370 1. Levenson, R. M., Borowsky, A. D. & Angelo, M. Immunohistochemistry and mass spectrometry
- 371 for highly multiplexed cellular molecular imaging. *Lab Invest* **95**, 397–405 (2015).
- 372 2. Matos, L. L. de, Trufelli, D. C., de Matos, M. G. L. & da Silva Pinhal, M. A.
- 373 Immunohistochemistry as an important tool in biomarkers detection and clinical practice.
- 374 *Biomark Insights* **5**, 9–20 (2010).
- 375 3. Chlipala, E. A. *et al.* An Image Analysis Solution For Quantification and Determination of
- 376 Immunohistochemistry Staining Reproducibility. *Appl Immunohistochem Mol Morphol* **28**, 428–
- 377 436 (2020).
- 378 4. Thunnissen, E. *et al.* The Use of Immunohistochemistry Improves the Diagnosis of Small Cell
- 379 Lung Cancer and Its Differential Diagnosis. An International Reproducibility Study in a
- 380 Demanding Set of Cases. *Journal of Thoracic Oncology* **12**, 334–346 (2017).
- 381 5. Yatabe, Y. *et al.* Best Practices Recommendations for Diagnostic Immunohistochemistry in
- 382 Lung Cancer. *Journal of Thoracic Oncology* **14**, 377–407 (2019).
- 383 6. Zaha, D. C. Significance of immunohistochemistry in breast cancer. *World J Clin Oncol* **5**, 382–
- 384 392 (2014).
- 385 7. McCabe, A., Dolled-Filhart, M., Camp, R. L. & Rimm, D. L. Automated quantitative analysis
- 386 (AQUA) of in situ protein expression, antibody concentration, and prognosis. *J Natl Cancer Inst*
- 387 **97**, 1808–1815 (2005).
- 388 8. Taube, J. M. *et al.* The Society for Immunotherapy of Cancer statement on best practices for
- 389 multiplex immunohistochemistry (IHC) and immunofluorescence (IF) staining and validation. *J*
- 390 *Immunother Cancer* **8**, e000155 (2020).
- 391 9. Zimak, J., Schweller, R. M., Duose, D. Y., Hittelman, W. N. & Diehl, M. R. Programming in situ
- 392 immunofluorescence intensities through interchangeable reactions of dynamic DNA
- 393 complexes. *ChemBiochem* **13**, 2722–2728 (2012).

- 394 10. Neher, R. & Neher, E. Optimizing imaging parameters for the separation of multiple labels  
395 in a fluorescence image. *J Microsc* **213**, 46–62 (2004).
- 396 11. Patel, S. S. & Rodig, S. J. Overview of Tissue Imaging Methods. in *Biomarkers for*  
397 *Immunotherapy of Cancer: Methods and Protocols* (eds. Thurin, M., Cesano, A. & Marincola,  
398 F. M.) 455–465 (Springer New York, 2020). doi:10.1007/978-1-4939-9773-2\_21.
- 399 12. Binnewies, M. *et al.* Understanding the tumor immune microenvironment (TIME) for  
400 effective therapy. *Nat Med* **24**, 541–550 (2018).
- 401 13. Bodenmiller, B. Multiplexed Epitope-Based Tissue Imaging for Discovery and Healthcare  
402 Applications. *Cell Systems* **2**, 225–238 (2016).
- 403 14. Angelo, M. *et al.* Multiplexed ion beam imaging of human breast tumors. *Nat Med* **20**, 436–  
404 442 (2014).
- 405 15. Keren, L. *et al.* MIBI-TOF: A multiplexed imaging platform relates cellular phenotypes and  
406 tissue structure. *Sci Adv* **5**, eaax5851 (2019).
- 407 16. Keren, L. *et al.* A Structured Tumor-Immune Microenvironment in Triple Negative Breast  
408 Cancer Revealed by Multiplexed Ion Beam Imaging. *Cell* **174**, 1373-1387.e19 (2018).
- 409 17. Risom, T. *et al.* Transition to invasive breast cancer is associated with progressive  
410 changes in the structure and composition of tumor stroma. *bioRxiv* 2021.01.05.425362 (2021)  
411 doi:10.1101/2021.01.05.425362.
- 412 18. McCaffrey, E. F. *et al.* Multiplexed imaging of human tuberculosis granulomas uncovers  
413 immunoregulatory features conserved across tissue and blood. *bioRxiv* 2020.06.08.140426  
414 (2020) doi:10.1101/2020.06.08.140426.
- 415 19. Goltsev, Y. *et al.* Deep Profiling of Mouse Splenic Architecture with CODEX Multiplexed  
416 Imaging. *Cell* **174**, 968-981.e15 (2018).
- 417 20. Schulz, D. *et al.* Simultaneous Multiplexed Imaging of mRNA and Proteins with Subcellular  
418 Resolution in Breast Cancer Tissue Samples by Mass Cytometry. *Cell Syst* **6**, 25-36.e5 (2018).

- 419 21. Giesen, C. *et al.* Highly multiplexed imaging of tumor tissues with subcellular resolution by  
420 mass cytometry. *Nat Methods* **11**, 417–422 (2014).
- 421 22. Chen, H. X. *et al.* Network for Biomarker Immunoprofiling for Cancer Immunotherapy:  
422 Cancer Immune Monitoring and Analysis Centers and Cancer Immunologic Data Commons  
423 (CIMAC-CIDC). *Clin Cancer Res* **27**, 5038–5048 (2021).
- 424 23. Baranski, A. *et al.* MAUI (MBI Analysis User Interface)—An image processing pipeline for  
425 Multiplexed Mass Based Imaging. *PLOS Computational Biology* **17**, e1008887 (2021).
- 426 24. Greenwald, N. F. *et al.* Whole-cell segmentation of tissue images with human-level  
427 performance using large-scale data annotation and deep learning. *bioRxiv* 2021.03.01.431313  
428 (2021) doi:10.1101/2021.03.01.431313.
- 429 25. Van Gassen, S. *et al.* FlowSOM: Using self-organizing maps for visualization and  
430 interpretation of cytometry data. *Cytometry A* **87**, 636–645 (2015).
- 431
